# Supplementary material
Source: publisher figshare collection journal article supplement (https://tandf.figshare.com/articles/dataset/_/6445106)
Supplement: Supplementary file 1 [file 1]

Archive with 2 entries (2 files):
- iaut_a_1477133_sm1406.pdf
- iaut_a_1477133_sm1405.docx
