# Supplementary material
Source: publisher figshare collection journal article supplement (https://tandf.figshare.com/articles/dataset/_/6445106)
Supplement: Supplementary file 1 [file 1 › iaut_a_1477133_sm1405.docx]

**Table S1 Correlation between the expression of IL-6, CEA, NSE and CYFRA21-1 in serum of NSCLC patients.**

|  | CEA | | NSE | | CYFRA21-1 | |
| --- | --- | --- | --- | --- | --- | --- |
| IL-6 | r | P | r | P | r | P |
| 0.854 | <0.01 | 0.971 | <0.01 | 0.972 | <0.01 |
